# Supplementary material for: Assessing the Validity of Normalizing Aflatoxin B1-Lysine Albumin Adduct Biomarker Measurements to Total Serum Albumin Concentration across Multiple Human Population Studies
Source: MDPI journal article supplement (doi:10.3390/toxins14030162), 2022-02-23
Supplement: s1 [file s1]

Article

# Assessing the Validity of Normalizing Aflatoxin B<sub>1</sub>-Lysine Albumin Adduct Biomarker Measurements to Total Serum Albumin Concentration across Multiple Human Population Studies

Joshua W. Smith, Derek K. Ng, Christian S. Alvarez, Patricia A. Egner, Sean M. Burke, Jian-Guo Chen, Thomas W. Kensler, Jill Koshiol, Alvaro Rivera-Andrade, María F. Kroker-Lobos, Manuel Ramírez-Zea, Katherine A. McGlynn and John D. Groopman

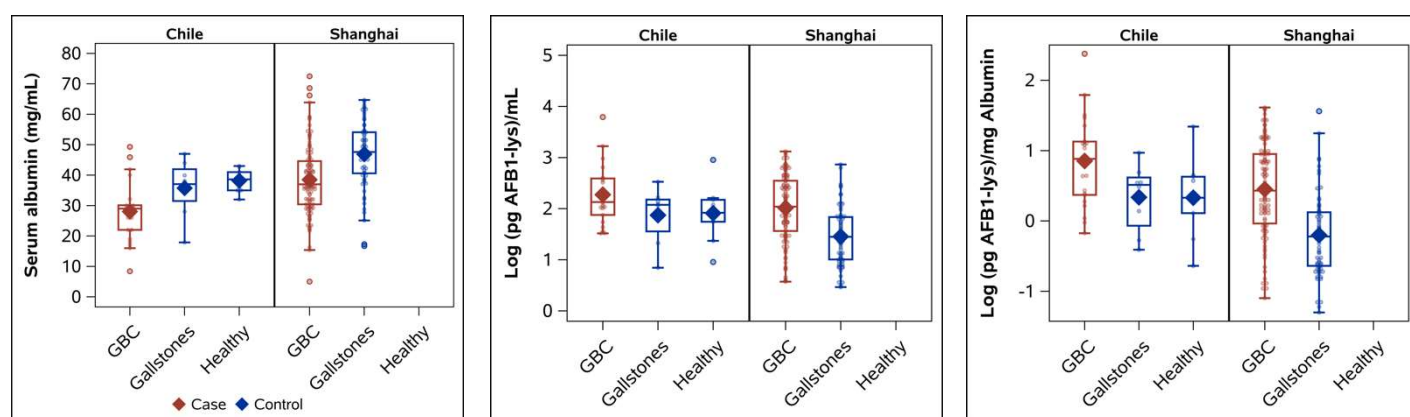

**Figure S1.** HSA, raw AFB<sub>1</sub>-lys, and normalized AFB<sub>1</sub>-lys levels in each gallbladder cancer (GBC) case-control study.
